# Supplementary material for: Screening for cardiac contractile dysfunction using an artificial intelligence–enabled electrocardiogram
Source: Springer Nature journal article supplement (doi:10.1038/s41591-018-0240-2), 2018-11-14
Supplement: 41591_2018_240_MOESM1_ESM.pdf [file 41591_2018_240_MOESM1_ESM.pdf]

In the format provided by the authors and unedited.

# Screening for cardiac contractile dysfunction using an artificial intelligence-enabled electrocardiogram

Zachi I. Attia<sup>1</sup>, Suraj Kapa<sup>1</sup>, Francisco Lopez-Jimenez<sup>1</sup>, Paul M. McKie <sup>1</sup>, Dorothy J. Ladewig<sup>2</sup>, Gaurav Satam<sup>2</sup>, Patricia A. Pellikka <sup>1</sup>, Maurice Enriquez-Sarano<sup>1</sup>, Peter A. Noseworthy <sup>1</sup>, Thomas M. Munger<sup>1</sup>, Samuel J. Asirvatham<sup>1</sup>, Christopher G. Scott<sup>3</sup>, Rickey E. Carter <sup>4</sup> and Paul A. Friedman <sup>1\*</sup>

---

<sup>1</sup>Cardiovascular Medicine, Mayo Clinic, Rochester, MN, USA. <sup>2</sup>Business Development, Mayo Clinic, Rochester, MN, USA. <sup>3</sup>Health Sciences Research, Mayo Clinic, Rochester, MN, USA. <sup>4</sup>Health Sciences Research, Mayo Clinic, Jacksonville, FL, USA. \*e-mail: [friedman.paul@mayo.edu](mailto:friedman.paul@mayo.edu)

1 **Supplemental Information**

2

3 **Supplementary Figure 1 Legend: Distribution of Ejection Fraction based on**

4 **network classification.** Of patients classified as having a low ejection fraction using the

5 threshold selected to achieve similar sensitivity and specificity, 63.5% had a EF under

6 50%. If classified as normal, 1.3% had a  $EF \leq 35\%$ , and 90.1% had an  $EF \geq 50\%$ .

**Distribution of EF Values by Classification**

10,544 Patients classified as having Low EF

42,326 Patients classified as not having Low EF

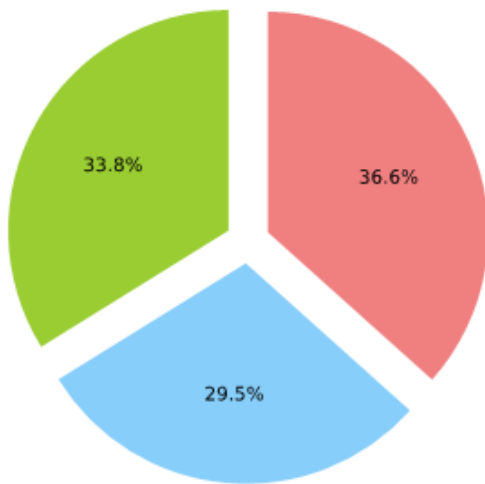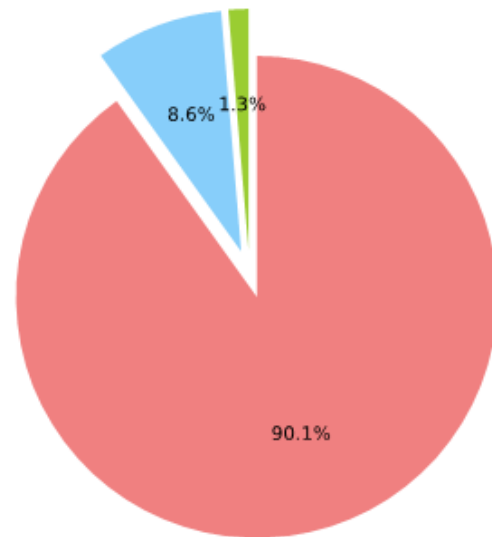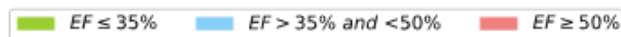

7

8

9 **Supplemental Figure 2 Legend: Effects of Ventricular Dysfunction on the 12-Lead**  
 10 **Electrocardiogram.** Cardiac hypertrophy, ventricular enlargement, and cardiac  
 11 abnormalities that lead to a reduced ejection fraction may be reflected by  
 12 electrocardiographic abnormalities in several ways including but not limited to those  
 13 outlined in the figure. Scarring of the ventricles may lead to changes in several  
 14 electrocardiographic findings due to aberrant electrical conduction, including the  
 15 presence of Q waves, QRS prolongation, or fractionation in the QRS. In turn, the  
 16 hemodynamic abnormalities associated with poor forward flow may lead to other  
 17 arrhythmias such as atrial fibrillation. Enlargement and scarring of the ventricles may  
 18 lead to both depolarization abnormalities (reflected as abnormalities in the QRS as noted)  
 19 or repolarization prolongation as reflected by a long QT interval. In addition, enlargement  
 20 of the ventricle may lead to a shift in the cardiac axis which is reflected on the 12-lead  
 21 electrocardiogram by the net electrical activation vector, QRS height, and other findings.  
 22 All of these features may be present to different extents depending on the individual with  
 23 heart failure and the cause of heart failure.

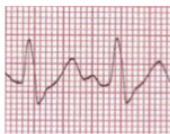

**Effects of heart failure on the 12-lead electrocardiogram**

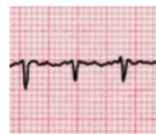

**QRS widening:** May be due to disease in intrinsic conduction system or myopathic process resulting in delayed activation across myocardium

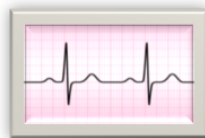

**Atrial arrhythmias:** May be due to increased stretch on atria from poor ventricular hemodynamics and atrial enlargement

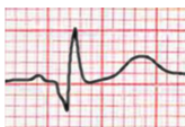

**Q waves / QRS fractionation:** May be due to volume overload of LV or regions of infarct resulting in delayed or atypical activation patterns

**Other features:**

- *R wave progression:* Delayed in infarcted patients
- *Net QRS axis:* Abnormal with ventricular enlargement
- *Atrial size:* Predicted by P wave morphology
- *QRS height:* Correlates with voltage and cardiac size
- *Heart rate variability:* Correlates with autonomic state, which is often abnormal in heart failure

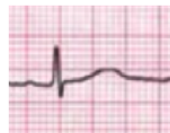

**Repolarization abnormalities:** Myocardial disease may be reflected by QT prolongation on the ECG

24

25 **Supplemental Figure 3 Legend – Network Architecture:** an abstraction of the selected  
 26 architecture, the network is composed of three main part : 1) temporal features extraction  
 27 – using convolutional blocks on the temporal axis. 2) Spatial feature extraction – using  
 28 similar convolutional blocks but with no zero padding. 3) Dense/Fully connected network  
 29 to regress the visual features to the output.

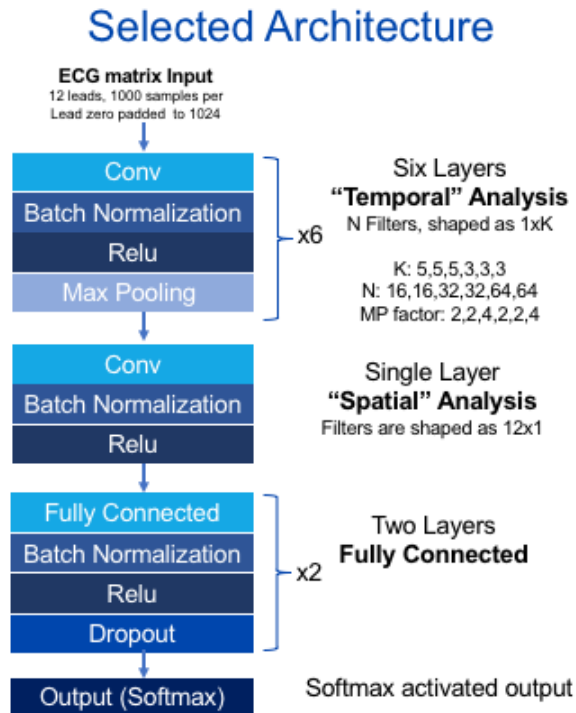

30  
 31
